# Supplementary material for: Neurophysiological brain function predicts response to cognitive rehabilitation and mindfulness in multiple sclerosis: a randomized trial
Source: PubMed Central journal article supplement (PMC10972975; doi:10.1007/s00415-024-12183-w), 2024-01-26
Supplement: 415_2024_12183_MOESM1_ESM.pdf [file 415_2024_12183_MOESM1_ESM.pdf]

**Supplemental eTable 1.** Brainnetome regions<sup>1</sup> included in this study

| <b>Lobe</b>        | <b>Gyrus</b>           | <b>ID Left hemisphere</b> | <b>ID Right hemisphere</b>              | <b>Abbreviation and description of area</b> |
|--------------------|------------------------|---------------------------|-----------------------------------------|---------------------------------------------|
| Frontal Lobe       | Superior Frontal Gyrus | 1                         | 2                                       | A8m, medial area 8                          |
|                    |                        | 3                         | 4                                       | A8dl, dorsolateral area 8                   |
|                    |                        | 5                         | 6                                       | A9l, lateral area 9                         |
|                    |                        | 7                         | 8                                       | A6dl, dorsolateral area 6                   |
|                    |                        | 9                         | 10                                      | A6m, medial area 6                          |
|                    |                        | 11                        | 12                                      | A9m, medial area 9                          |
|                    |                        | 13                        | 14                                      | A10m, medial area 10                        |
|                    | Middle Frontal Gyrus   | 15                        | 16                                      | A9/46d, dorsal area 9/46                    |
|                    |                        | 17                        | 18                                      | IFJ, inferior frontal junction              |
|                    |                        | 19                        | 20                                      | A46, area 46                                |
|                    |                        | 21                        | 22                                      | A9/46v, ventral area 9/46                   |
|                    |                        | 23                        | 24                                      | A8vl, ventrolateral area 8                  |
|                    |                        | 25                        | 26                                      | A6vl, ventrolateral area 6                  |
|                    |                        | 27                        | 28                                      | A10l, lateral area 10                       |
|                    | Inferior Frontal Gyrus | 29                        | 30                                      | A44d,dorsal area 44                         |
|                    |                        | 31                        | 32                                      | IFS, inferior frontal sulcus                |
|                    |                        | 33                        | 34                                      | A45c, caudal area 45                        |
|                    |                        | 35                        | 36                                      | A45r, rostral area 45                       |
|                    |                        | 37                        | 38                                      | A44op, opercular area 44                    |
|                    |                        | 39                        | 40                                      | A44v, ventral area 44                       |
|                    | Orbital Gyrus          | 41                        | 42                                      | A14m, medial area 14                        |
|                    |                        | 43                        | 44                                      | A12/47o, orbital area 12/47                 |
|                    |                        | 45                        | 46                                      | A11l, lateral area 11                       |
|                    |                        | 47                        | 48                                      | A11m, medial area 11                        |
|                    |                        | 49                        | 50                                      | A13, area 13                                |
|                    |                        | 51                        | 52                                      | A12/47l, lateral area 12/47                 |
|                    | Precentral Gyrus       | 53                        | 54                                      | A4hf, area 4 (head and face region)         |
|                    |                        | 55                        | 56                                      | A6cdl, caudal dorsolateral area 6           |
|                    |                        | 57                        | 58                                      | A4ul, area 4 (upper limb region)            |
|                    |                        | 59                        | 60                                      | A4t, area 4 (trunk region)                  |
| 61                 |                        | 62                        | A4tl, area 4 (tongue and larynx region) |                                             |
| 63                 |                        | 64                        | A6cvl, caudal ventrolateral area 6      |                                             |
| Paracentral Lobule | 65                     | 66                        | A1/2/3ll, area1/2/3 (lower limb region) |                                             |
|                    | 67                     | 68                        | A4ll, area 4, (lower limb region)       |                                             |

|                                    |                          |            |                                                 |                                                             |
|------------------------------------|--------------------------|------------|-------------------------------------------------|-------------------------------------------------------------|
| Temporal Lobe                      | Superior Temporal Gyrus  | 69         | 70                                              | A38m, medial area 38                                        |
|                                    |                          | 71         | 72                                              | A41/42, area 41/42                                          |
|                                    |                          | 73         | 74                                              | TE1.0 and TE1.2                                             |
|                                    |                          | 75         | 76                                              | A22c, caudal area 22                                        |
|                                    |                          | 77         | 78                                              | A38l, lateral area 38                                       |
|                                    |                          | <b>79</b>  | 80                                              | A22r, rostral area 22                                       |
|                                    | Middle Temporal Gyrus    | <b>81</b>  | <b>82</b>                                       | A21c, caudal area 21                                        |
|                                    |                          | <b>83</b>  | <b>84</b>                                       | A21r, rostral area 21                                       |
|                                    |                          | 85         | 86                                              | A37dl, dorsolateral area37                                  |
|                                    |                          | <b>87</b>  | <b>88</b>                                       | aSTS, anterior superior temporal sulcus                     |
|                                    | Inferior Temporal Gyrus  | 89         | 90                                              | A20iv, intermediate ventral area 20                         |
|                                    |                          | 91         | 92                                              | A37elv, extreme lateroventral area37                        |
|                                    |                          | 93         | 94                                              | A20r, rostral area 20                                       |
|                                    |                          | <b>95</b>  | 96                                              | A20il, intermediate lateral area 20                         |
|                                    |                          | 97         | 98                                              | A37vl, ventrolateral area 37                                |
|                                    |                          | 99         | 100                                             | A20cl, caudolateral of area 20                              |
|                                    |                          | 101        | 102                                             | A20cv, caudoventral of area 20                              |
|                                    | Fusiform Gyrus           | 103        | 104                                             | A20rv, rostroventral area 20                                |
|                                    |                          | 105        | 106                                             | A37mv, medioventral area 37                                 |
|                                    |                          | 107        | 108                                             | A37lv, lateroventral area 37                                |
|                                    | Parahippocampal Gyrus    | 109        | 110                                             | A35/36r, rostral area 35/36                                 |
|                                    |                          | 111        | 112                                             | A35/36c, caudal area 35/36                                  |
|                                    |                          | <b>113</b> | 114                                             | TL, area TL (lateral PPHC, posterior parahippocampal gyrus) |
|                                    |                          | 115        | 116                                             | A28/34, area 28/34 (EC, entorhinal cortex)                  |
| 117                                |                          | 118        | TI, area TI (temporal agranular insular cortex) |                                                             |
| 119                                |                          | 120        | TH, area TH (medial PPHC)                       |                                                             |
| posterior Superior Temporal Sulcus | <b>121</b>               | <b>122</b> | rpSTS, rostoposterior superior temporal sulcus  |                                                             |
|                                    | <b>123</b>               | 124        | cpSTS, caudoposterior superior temporal sulcus  |                                                             |
| Parietal Lobe                      | Superior Parietal Lobule | 125        | 126                                             | A7r, rostral area 7                                         |
|                                    |                          | 127        | 128                                             | A7c, caudal area 7                                          |
|                                    |                          | 129        | 130                                             | A5l, lateral area 5                                         |
|                                    |                          | 131        | 132                                             | A7pc, postcentral area 7                                    |
|                                    |                          | 133        | 134                                             | A7ip, intraparietal area 7 (HIP3)                           |
|                                    | Inferior Parietal Lobule | 135        | 136                                             | A39c, caudal area 39 (PGp)                                  |
|                                    |                          | 137        | 138                                             | A39rd, rostradorsal area 39 (Hip3)                          |
|                                    |                          | 139        | 140                                             | A40rd, rostradorsal area 40 (PFt)                           |

|                |                               |               |            |                                                  |                                                           |
|----------------|-------------------------------|---------------|------------|--------------------------------------------------|-----------------------------------------------------------|
|                |                               | <b>141</b>    | 142        | A40c, caudal area 40 (PFm)                       |                                                           |
|                |                               | <b>143</b>    | <b>144</b> | A39rv, rostroventral area 39 (PGa)               |                                                           |
|                |                               | 145           | 146        | A40rv, rostroventral area 40 (PFop)              |                                                           |
|                | Precuneus                     |               | 147        | 148                                              | A7m, medial area 7 (PEp)                                  |
|                |                               |               | 149        | 150                                              | A5m, medial area 5 (PEm)                                  |
|                |                               |               | <b>151</b> | 152                                              | dmPOS, dorsomedial parieto-occipital sulcus (PEr)         |
|                |                               |               | <b>153</b> | <b>154</b>                                       | A31, area 31 (Lc1)                                        |
|                | Postcentral Gyrus             |               | 155        | 156                                              | A1/2/3ulhf, area 1/2/3 (upper limb, head and face region) |
|                |                               |               | 157        | 158                                              | A1/2/3tonla, area 1/2/3 (tongue and larynx region)        |
|                |                               |               | 159        | 160                                              | A2, area 2                                                |
|                |                               |               | 161        | 162                                              | A1/2/3tru, area1/2/3 (trunk region)                       |
|                | Insular Lobe                  | Insular Gyrus | 163        | 164                                              | G, hypergranular insula                                   |
| <b>165</b>     |                               |               | 166        | vla, ventral agranular insula                    |                                                           |
| 167            |                               |               | 168        | dla, dorsal agranular insula                     |                                                           |
| 169            |                               |               | 170        | vid/vlg, ventral dysgranular and granular insula |                                                           |
| 171            |                               |               | 172        | dlg, dorsal granular insula                      |                                                           |
| 173            |                               |               | 174        | dld, dorsal dysgranular insula                   |                                                           |
| Limbic Lobe    | Cingulate Gyrus               | <b>175</b>    | <b>176</b> | A23d, dorsal area 23                             |                                                           |
|                |                               | 177           | <b>178</b> | A24rv, rostroventral area 24                     |                                                           |
|                |                               | <b>179</b>    | 180        | A32p, pregenual area 32                          |                                                           |
|                |                               | <b>181</b>    | <b>182</b> | A23v, ventral area 23                            |                                                           |
|                |                               | 183           | 184        | A24cd, caudodorsal area 24                       |                                                           |
|                |                               | 185           | 186        | A23c, caudal area 23                             |                                                           |
|                |                               | <b>187</b>    | <b>188</b> | A32sg, subgenual area 32                         |                                                           |
| Occipital Lobe | MedioVentral Occipital Cortex | 189           | 190        | cLinG, caudal lingual gyrus                      |                                                           |
|                |                               | 191           | 192        | rCunG, rostral cuneus gyrus                      |                                                           |
|                |                               | 193           | 194        | cCunG, caudal cuneus gyrus                       |                                                           |
|                |                               | 195           | 196        | rLinG, rostral lingual gyrus                     |                                                           |
|                |                               | 197           | 198        | vmPOS, ventromedial parietooccipital sulcus      |                                                           |
|                | lateral Occipital Cortex      | 199           | 200        | mOccG, middle occipital gyrus                    |                                                           |
|                |                               | 201           | 202        | V5/MT+, area V5/MT+                              |                                                           |
|                |                               | 203           | 204        | OPC, occipital polar cortex                      |                                                           |
|                |                               | 205           | 206        | iOccG, inferior occipital gyrus                  |                                                           |
|                |                               | 207           | 208        | msOccG, medial superior occipital gyrus          |                                                           |
|                |                               | 209           | 210        | lsOccG, lateral superior occipital gyrus         |                                                           |
|                | Amygdala                      | 211           | 212        | mAmyg, medial amygdala                           |                                                           |

|                   |               |     |     |                                      |
|-------------------|---------------|-----|-----|--------------------------------------|
| Subcortical areas | Hippocampus   | 215 | 216 | rHipp, rostral hippocampus           |
|                   | Basal Ganglia | 221 | 222 | GP, globus pallidus                  |
|                   |               | 223 | 224 | NAC, nucleus accumbens               |
|                   |               | 227 | 228 | dCa, dorsal caudate                  |
|                   |               | 229 | 230 | dIPu, dorsolateral putamen           |
|                   | Thalamus      | 245 | 246 | IPFtha, lateral pre-frontal thalamus |

*Note.* This table represents the regions from the Brainnetome (BNA) atlas that were analyzed in this study. The regions included in the default mode network (DMN) are presented in bold, based on Yeo et al.<sup>2</sup>

## REFERENCES

1. Fan L, Li H, Zhuo J, et al. The Human Brainnetome Atlas: A New Brain Atlas Based on Connectional Architecture. *Cereb Cortex* 2016; 26: 3508-3526. 20160526. DOI: 10.1093/cercor/bhw157.
2. Yeo TW, De Jager PL, Gregory SG, et al. A second major histocompatibility complex susceptibility locus for multiple sclerosis. *Ann Neurol* 2007; 61: 228-236. 2007/01/26. DOI: 10.1002/ana.21063.
